# Supplementary material for: Highly photostable zinc selective molecular marker bearing flexible pivotal unit: opto-fluorescence enhancement effect and imaging applications in living systems
Source: Royal Society of Chemistry journal article supplement (doi:10.1039/c5dt00713e), 2015-01-01
Supplement: c5dt00713e1.pdf [file c5dt00713e1.pdf]

# Highly photostable zinc selective molecular marker bearing flexible pivotal unit: opto-fluorescence enhancement effect and imaging applications in living system

Sougata Sinha,<sup>a</sup> Pankaj Gaur,<sup>a</sup> Sagarika Dev,<sup>b</sup> Trinetra Mukherjee,<sup>c</sup> Jomon Mathew,<sup>d</sup> Subhrakanti Mukherjee,<sup>c</sup> Subrata Ghosh<sup>a,\*</sup>

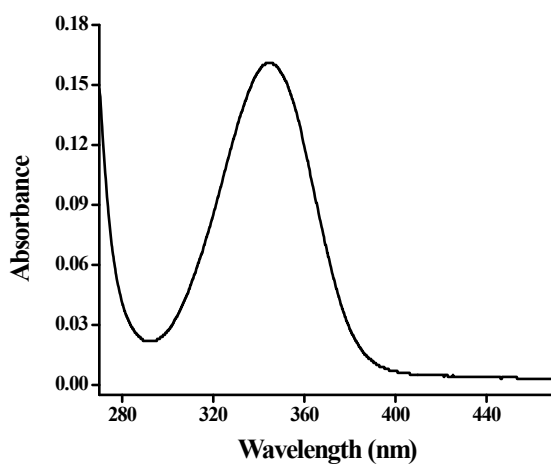

**Fig. S1** UV-vis spectra of L1 (20 μM) in dimethylformamide.

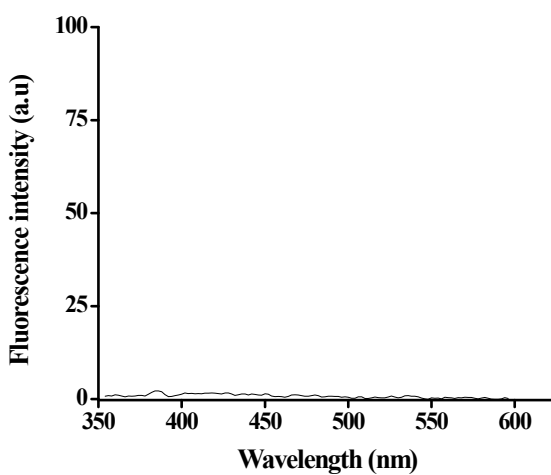

**Fig. S2** Emission spectra of L1 (20 μM) in dimethylformamide.

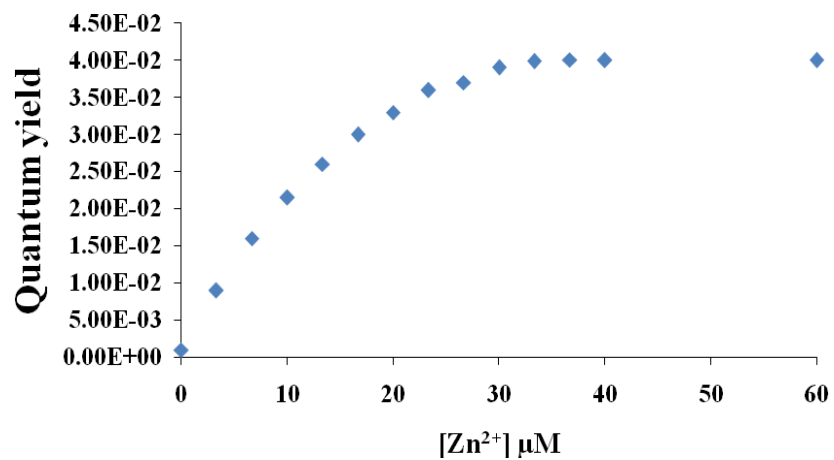

**Fig. S3** Increase in quantum yield of **L1** (20 μM) in dimethylformamide in the presence of different concentration  $Zn^{2+}$ .

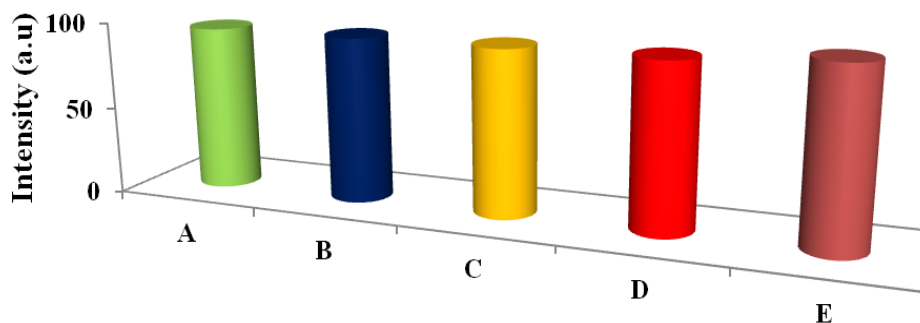

**Fig. S4** Effect of competitive biologically important metal ions on  $Zn^{2+}$  induced fluorescence of **L1**. A, B, C, D, E implies  $Na^+ + Zn^{2+}$ ,  $K^+ + Zn^{2+}$ ,  $Ca^{2+} + Zn^{2+}$ ,  $Mg^{2+} + Zn^{2+}$ ,  $Na^+ + K^+ + Ca^{2+} + Mg^{2+} + Zn^{2+}$  respectively.

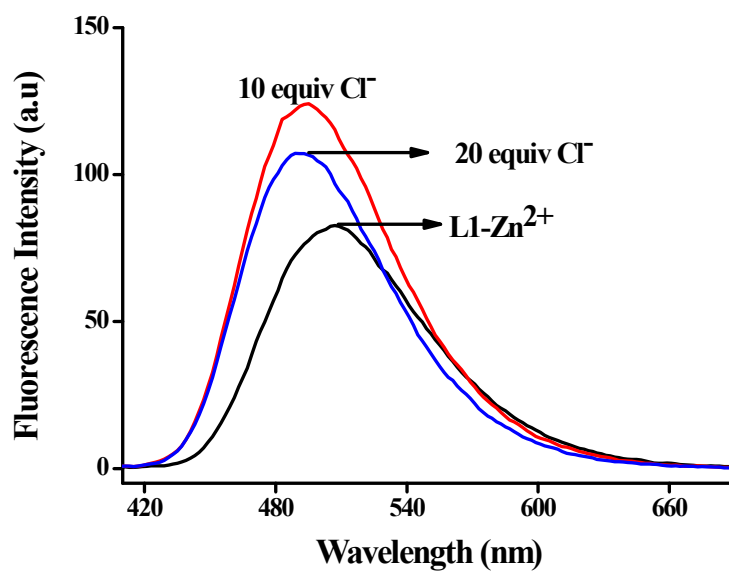

Fig. S5 Fate of Zn<sup>2+</sup> induced fluorescence of L1 in the presence of Cl<sup>-</sup> (0, 10 and 20 equiv).

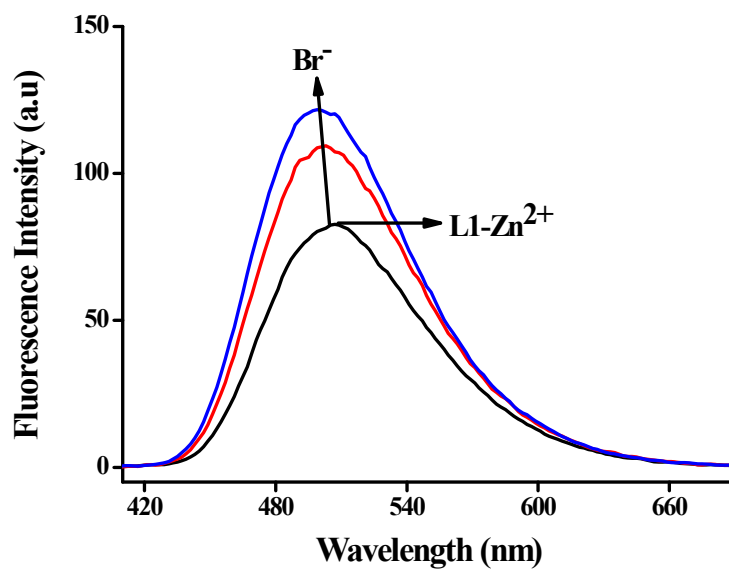

Fig. S6 Fate of Zn<sup>2+</sup> induced fluorescence of L1 in the presence of Br<sup>-</sup> (0, 10 and 20 equiv).

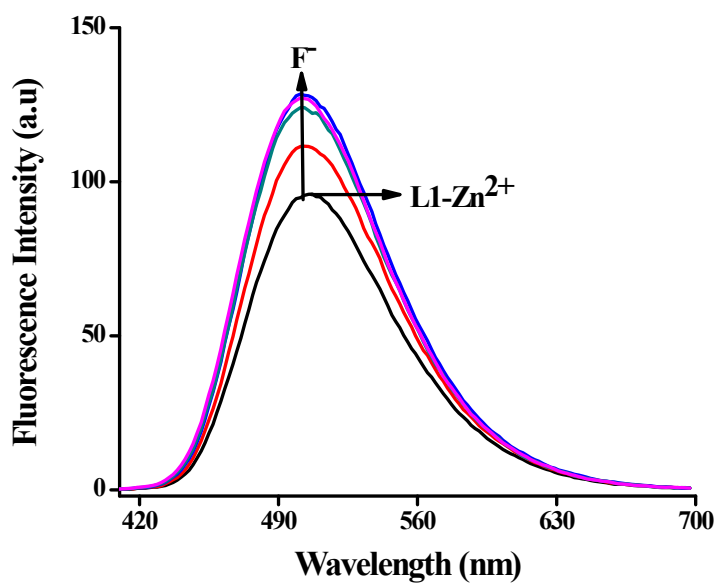

**Fig. S7** Fate of Zn<sup>2+</sup> induced fluorescence of L1 in the presence of F<sup>-</sup> (2, 4, 8 and 12 equiv).

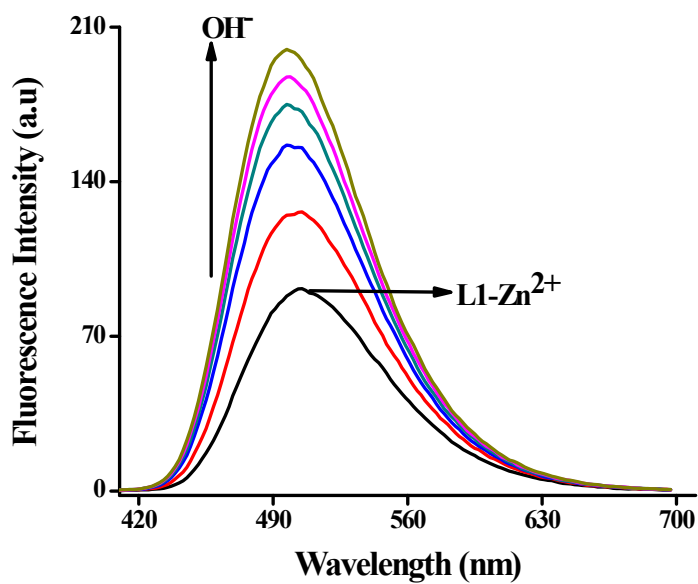

**Fig. S8** Fate of Zn<sup>2+</sup> induced fluorescence of L1 in the presence of OH<sup>-</sup> (5, 10, 15, 20 and 30 equiv).

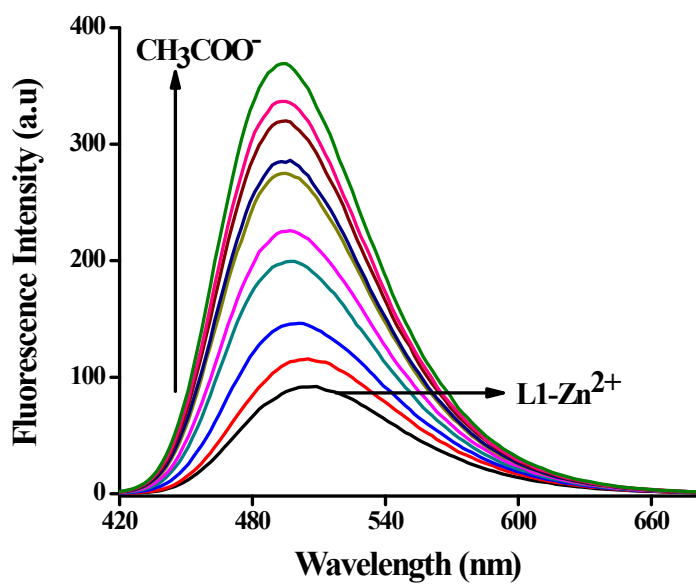

**Fig. S9** Fate of Zn<sup>2+</sup> induced fluorescence of L1 in the presence of CH<sub>3</sub>COO<sup>-</sup> (2, 4, 6, 8, 10, 12, 16, 20 and 30 equiv).

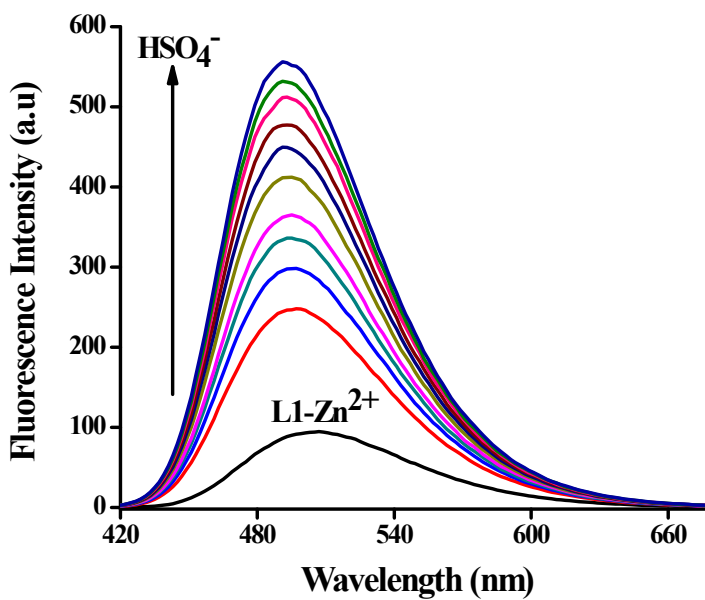

**Fig. S10** Fate of Zn<sup>2+</sup> induced fluorescence of L1 in the presence of OH<sup>-</sup> (1, 2, 3, 4, 6, 8, 10, 12, 16 and 20 equiv).

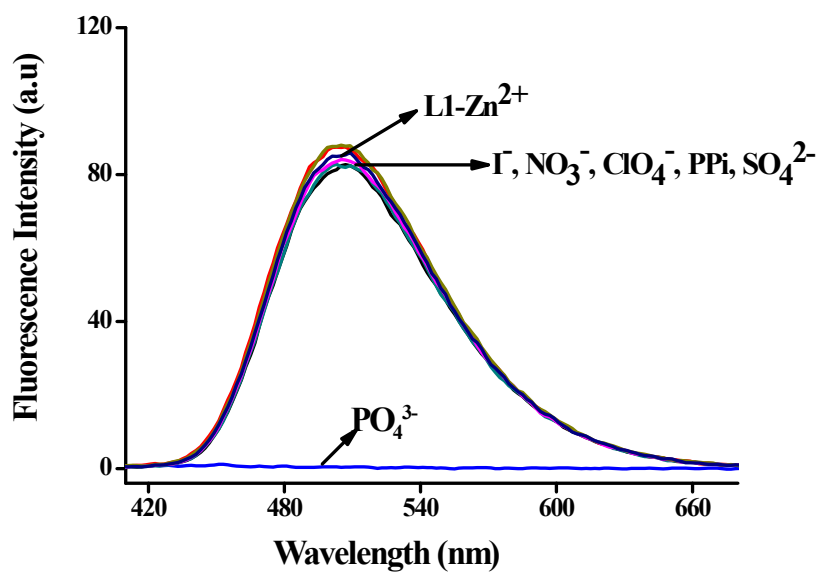

**Fig. S11** Fate of  $Zn^{2+}$  induced fluorescence of **L1** in the presence of 30 equiv of  $I^{-}$ ,  $NO_3^{-}$ ,  $ClO_4^{-}$ ,  $SO_4^{2-}$ ,  $P_2O_7^{4-}$  and 3 equiv of  $PO_4^{3-}$ .

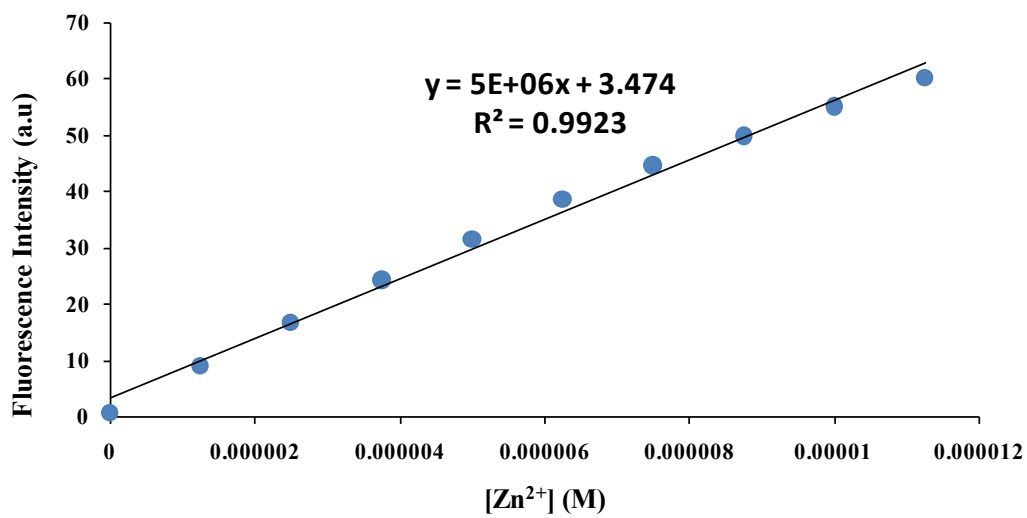

**Fig. S12** Limit of detection calculation

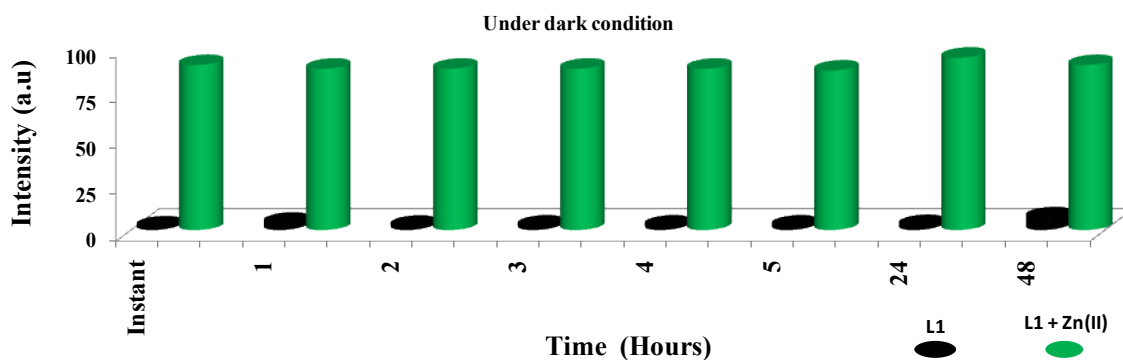

**Fig. S13** Effect of time on the emission of **L1** and corresponding  $\text{Zn}^{2+}$  induced fluorescence enhancement in dark condition (First emission profile of  $20 \mu\text{M}$  **L1** was recorded at one particular time, followed by recording the emission of **L1** after addition of  $40 \mu\text{M}$  of  $\text{Zn}^{2+}$ , the solutions were kept in dark condition).

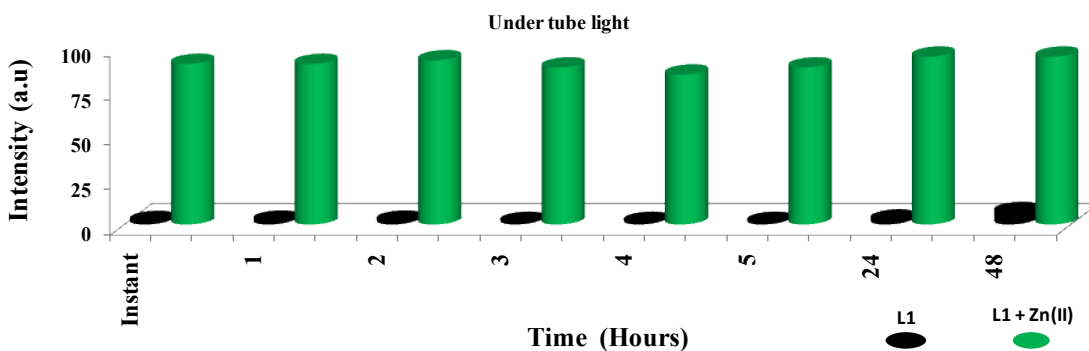

**Fig. S14** Effect of time on the emission of **L1** and corresponding  $\text{Zn}^{2+}$  induced fluorescence enhancement under normal tube light (First emission profile of  $20 \mu\text{M}$  **L1** was recorded at one particular time, followed by recording the emission of **L1** after addition of  $40 \mu\text{M}$  of  $\text{Zn}^{2+}$ , the solutions were kept under normal tube light).

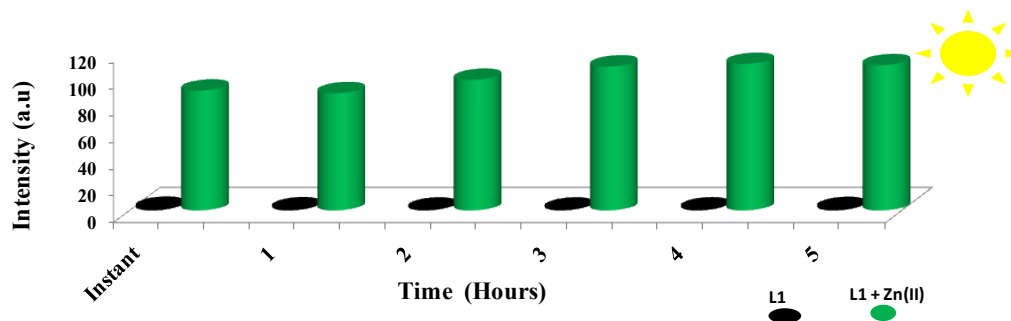

**Fig. S15** Effect of time on the emission of **L1** and corresponding  $\text{Zn}^{2+}$  induced fluorescence enhancement when kept under sunlight for a particular time (First emission profile of  $20 \mu\text{M}$  **L1** was recorded at one particular time, followed by recording the emission of **L1** after addition of  $40 \mu\text{M}$  of  $\text{Zn}^{2+}$ , the solutions were kept under sunlight for a particular time).

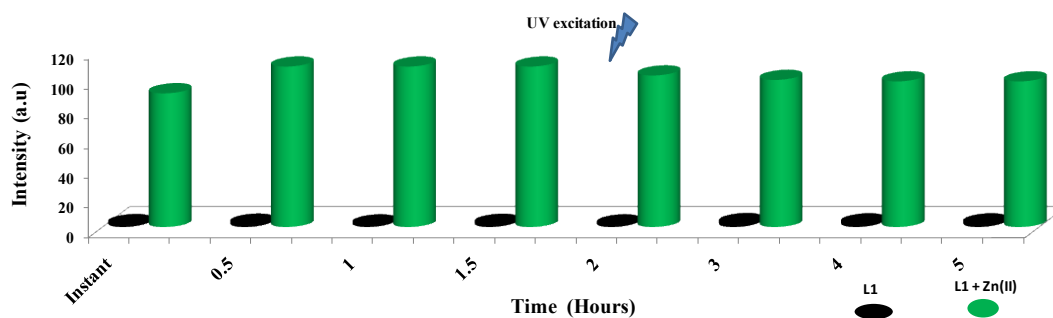

**Fig. S16** Effect of time on the emission of **L1** and corresponding  $\text{Zn}^{2+}$  induced fluorescence enhancement when kept under UV light for a particular time (First emission profile of  $20 \mu\text{M}$  **L1** was recorded at one particular time, followed by recording the emission of **L1** after addition of  $40 \mu\text{M}$  of  $\text{Zn}^{2+}$ , the solutions were kept under UV light for a particular time).



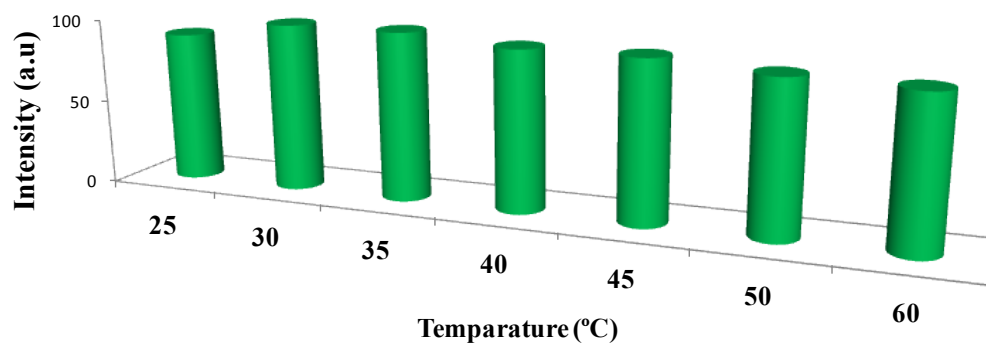

**Fig. S17** Effect of temperature on the emission of L1-Zn<sup>2+</sup> complex.

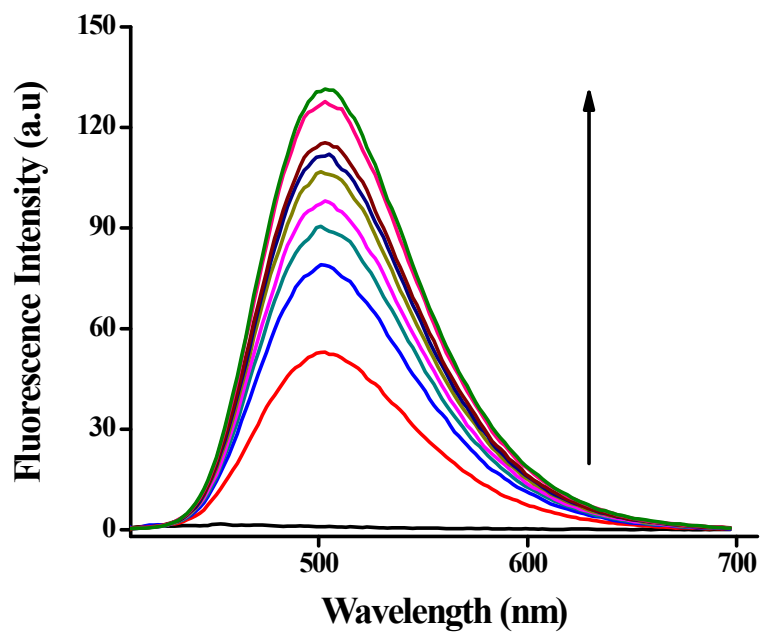

**Fig. S18** Emission spectrum of L1 (80 μM) in 10% HEPES buffered dimethylformamide (pH~7.4), in the presence of increasing amount of Zn<sup>2+</sup> (0-20 equiv).

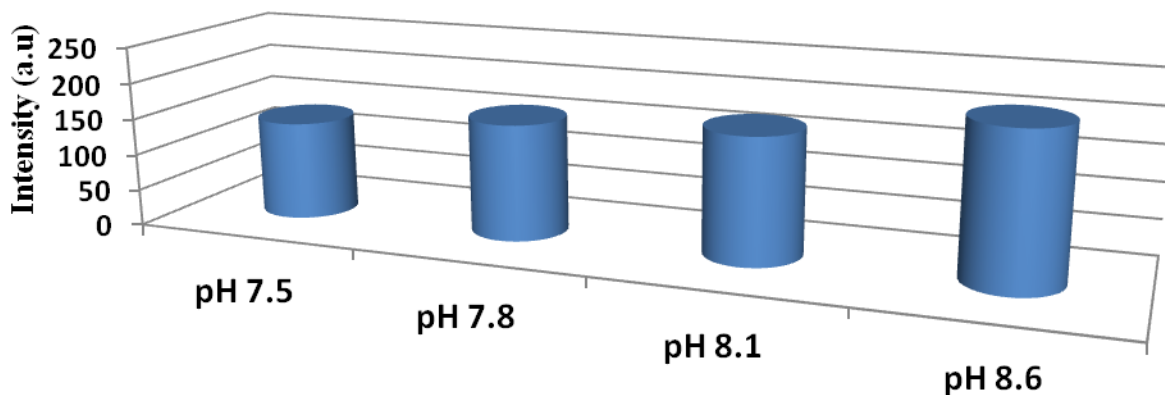

**Fig. S19** Fluorescence intensity of probe **L1** (80 μM) in different pH in the presence of 20 equiv of  $Zn^{2+}$ .

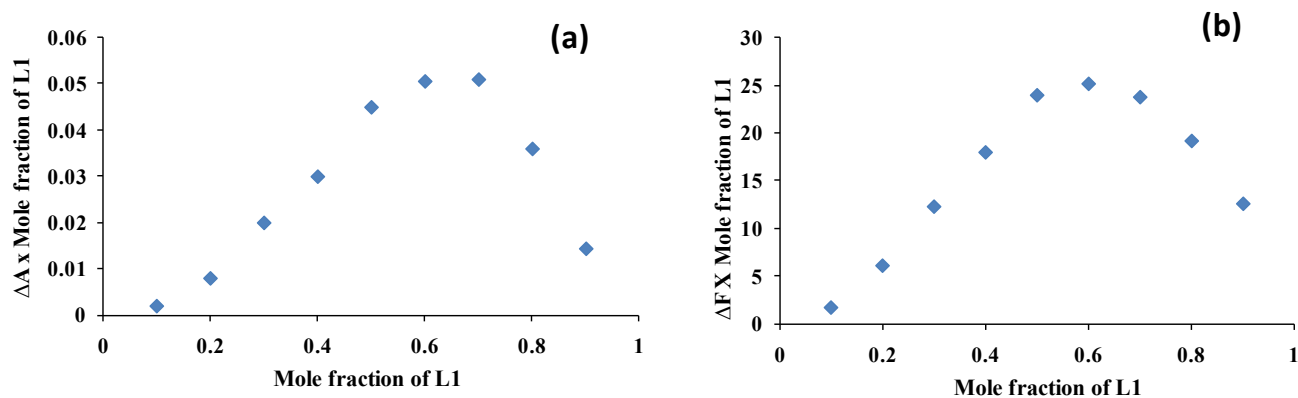

**Fig. S20** Job plot for the identification of **L1**- $Zn^{2+}$  complex stoichiometry using (a) absorbance values recorded at 400 nm, and (b) fluorescence intensities at 500 nm.

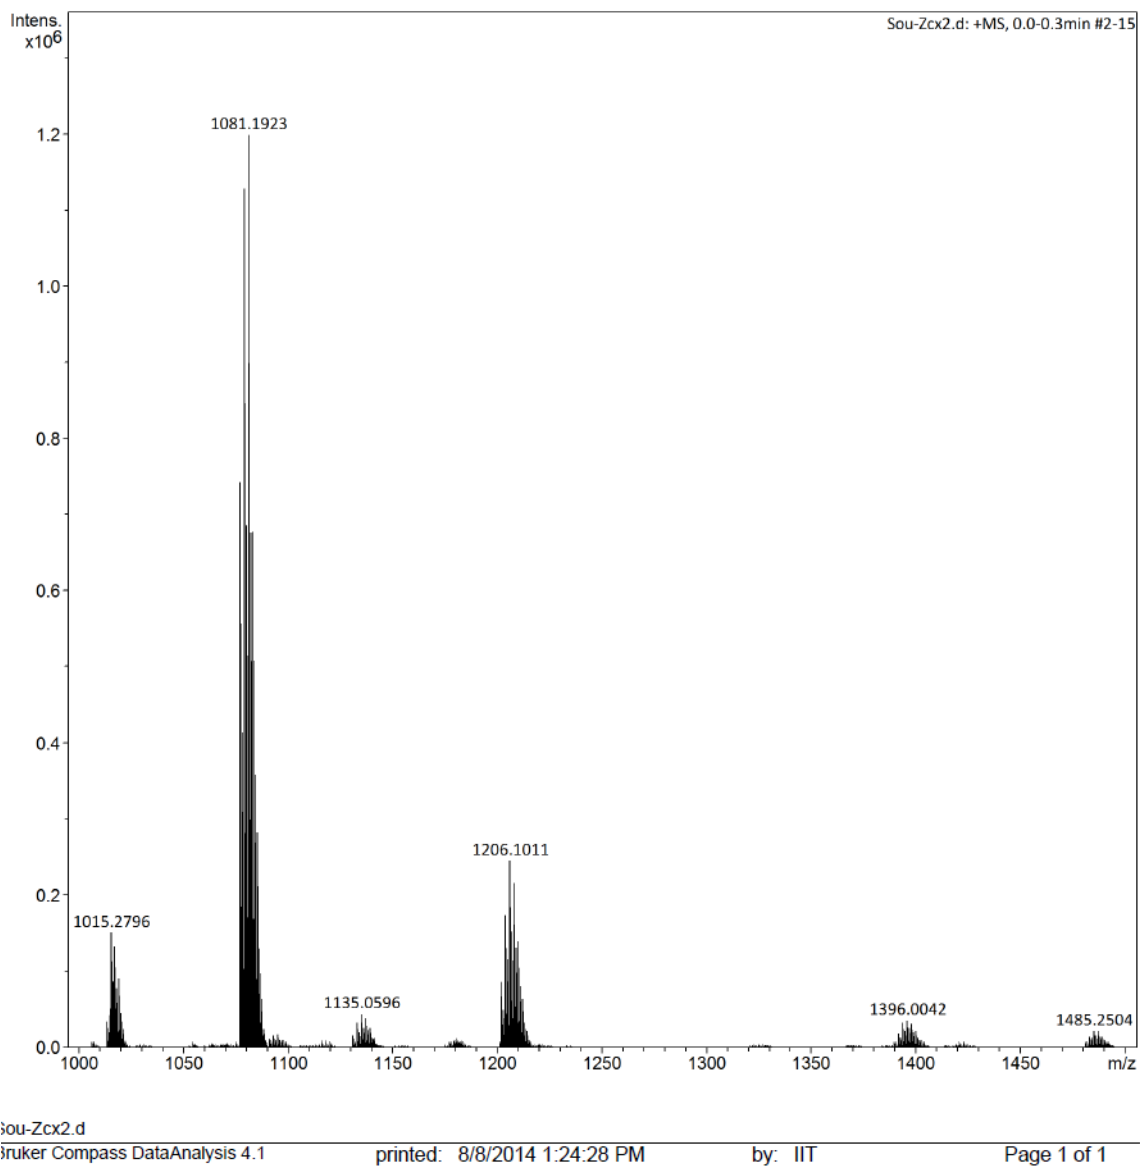

**Fig. S21** High-resolution mass spectra of **L1-Zn<sup>2+</sup>**

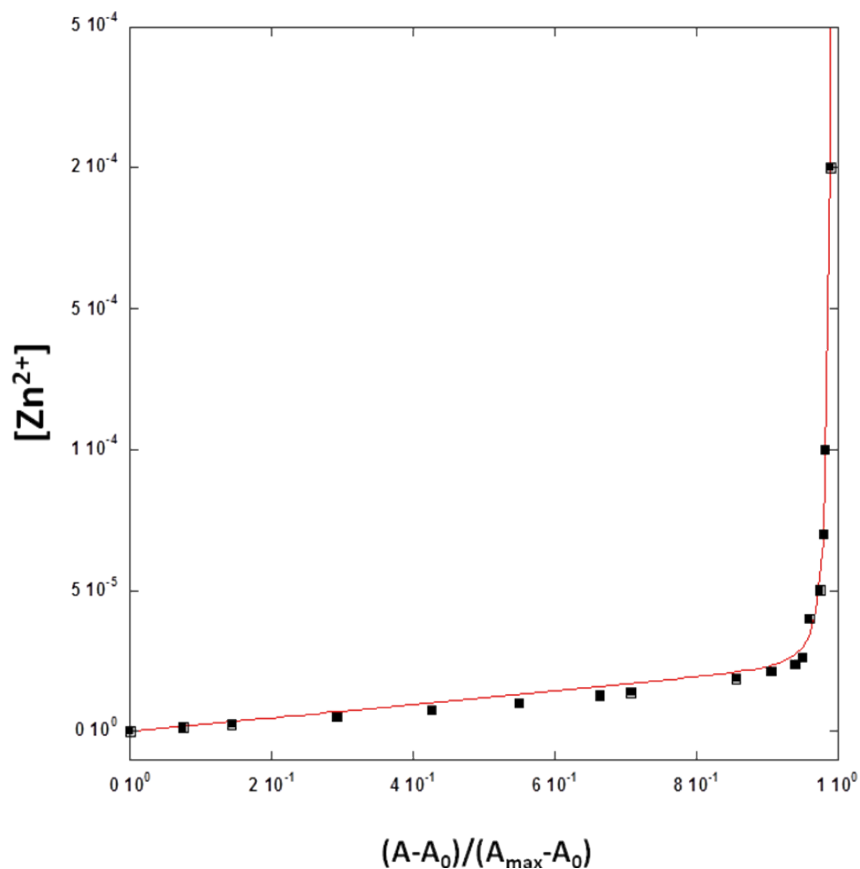

Fig. S22 Binding constant calculation for the L1-Zn<sup>2+</sup> complex.

## MTT assay for cell viability testing<sup>1-4</sup>

### Introduction

MTT assay, known as cell viability and proliferation assay is the assay of choice to assay the toxicity of a newly developed compound in *in-vitro* cell culture experiment. The full form of MTT is 3-[4, 5-dimethylthiazol-2-yl]-2, 5-diphenyltetrazolium bromide.

### Principle

This assay mainly relies on the reductive cleavage of the yellow tetrazolium salt MTT, 3-[4,5-dimethylthiazol-2-yl]-2, 5-diphenyltetrazolium bromide, into dark purple colored formazan by metabolically dynamic cells which can be evaluated spectrophotometrically at 570 nm.

**Materials:**

1. Phosphate buffer saline of pH 7
2. Freshly prepared and filtered MTT (5 mg/ml in PBS); kept in dark condition.
3. Freshly prepared acidified isopropanol solution (0.1 N HCl in absolute isopropanol)
4. Stock solutions of zinc nitrate (200 nM, 2  $\mu$ M and 3 mM)
5. Stock solutions of probe **L1** (400 nM, 4  $\mu$ M and 3 mM)

**Procedure:**

1.5 ml exponentially growing broth culture of *Candida albicans* (IMTECH No. 3018), grown in Potato Dextrose Agar medium of pH 6.0, incubated at 37°C temperature was centrifuged at 6,000 rpm for 5 minutes. Then the pellet were washed carefully twice with normal saline solution and suspended in various solutions as mentioned below around 10<sup>8</sup> cell/ml cell density.

Following four experimental sets (each set composed of three tubes) were prepared for each type of cell culture.

- i) Set A: Each tube contains only the *Candida albicans* cells. This is used as positive control.
- ii) Set B: Each tube contains the cells suspended in 200  $\mu$ l probe **L1** (3 mM) and incubated for 2 hours.
- iii) Set C: Each tube contains the cells suspended in 200  $\mu$ l zinc nitrate (2  $\mu$ M), incubated for 2 hours followed by incubation of 200  $\mu$ l probe **L1** (4  $\mu$ M) for 2 hours.
- iv) Set D: Each tube contains the cells suspended in 200  $\mu$ l zinc nitrate (3 mM), incubated for 2 hours, then 200  $\mu$ l probe **L1** (3 mM) is added and again incubated for 2 hours.

After the incubation, the cells were again centrifuged at 6,000 rpm for 5 minutes and the pellet was washed twice with normal saline solution. Each pellet was suspended in 3 ml PBS buffer. 300  $\mu$ l MTT was added to each tube. All sets were incubated for 4 hrs in dark condition at 37°C temperature. After incubation, 3 ml of freshly prepared acidic isopropanol solution was added to

each tube of all six experimental sets. Contents were mixed well and incubated for another 1 hr in dark at 37<sup>o</sup> C for solubilizing the complex. After incubation O.D. of all tubes of each set were measured at 570 nm.

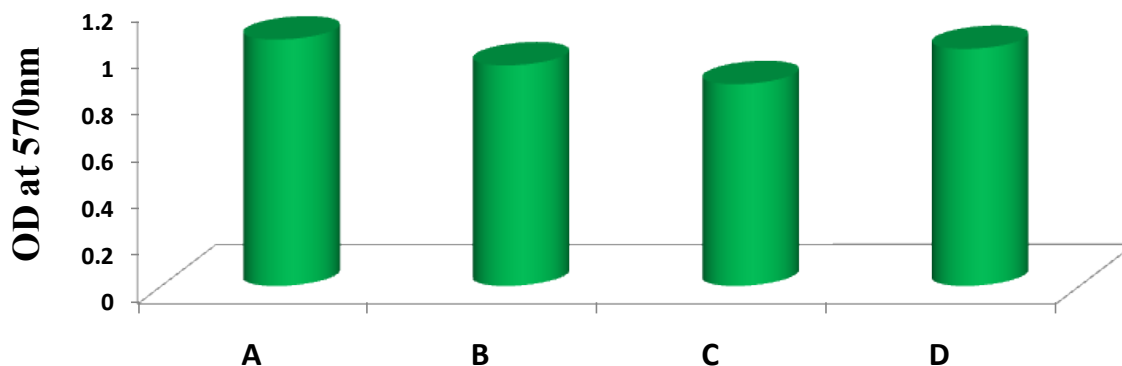

**Fig. S23** Graphical presentation of results of MTT assay: (A) Only Candida, (B) Candida + **L1** (3 mM), (C) Candida + Zn<sup>2+</sup> (2 μM) + **L1** (4 μM), (D) Candida + Zn<sup>2+</sup> (200 nM) + **L1** (400 nM)

**Table S1** Result for MTT assay of *Candida* cells for probe **L1**

| Incubation conditions                                           | OD at 570nm    |
|-----------------------------------------------------------------|----------------|
|                                                                 | <i>Candida</i> |
| (A) Only Candida cells                                          | 1.05           |
| (B) Candida cells + probe <b>L1</b> (3 mM)                      | 0.94           |
| (C) Candida cells + 2 μM zinc nitrate+ 4 μM probe <b>L1</b>     | 0.86           |
| (D) Candida cells + 200 nM zinc nitrate+ 400 nM probe <b>L1</b> | 1.01           |

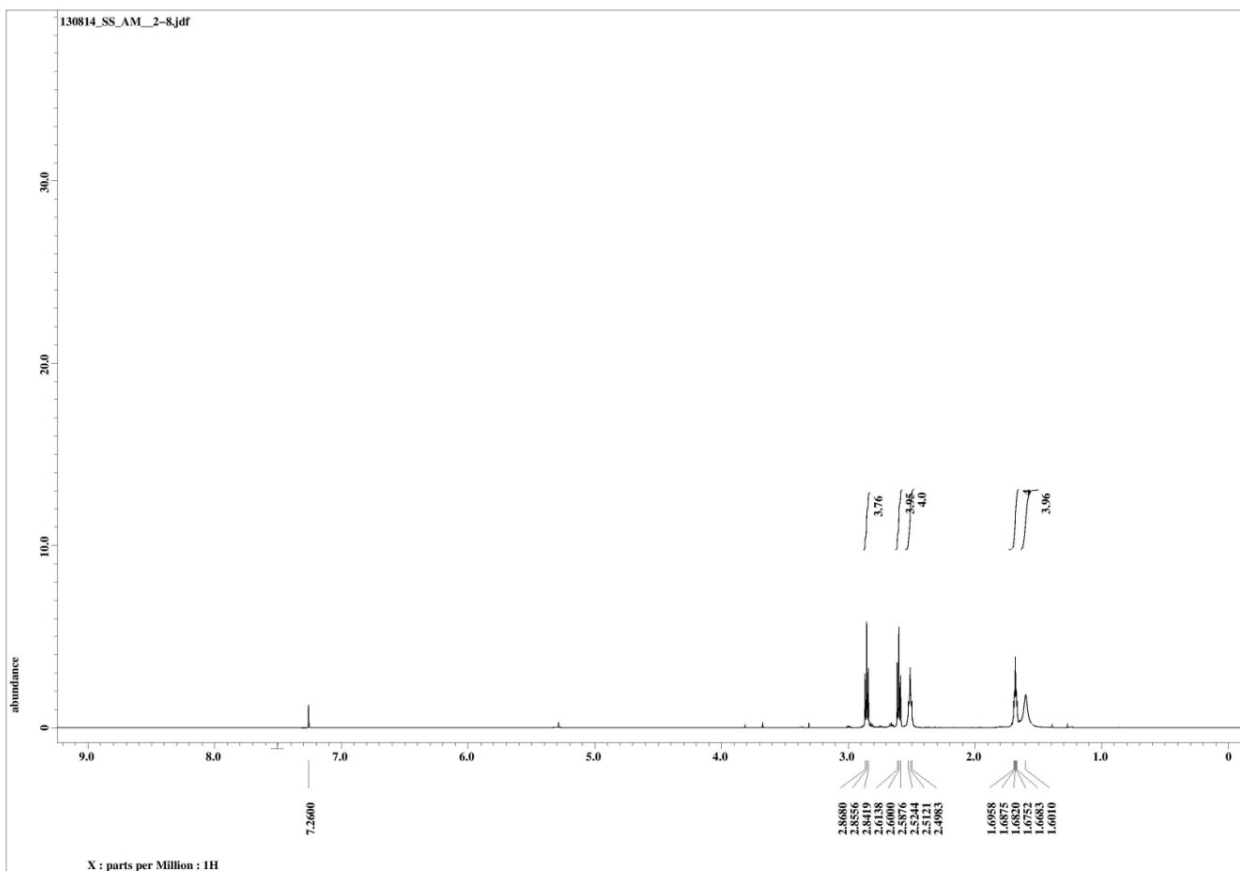

Fig. S24  $^1\text{H-NMR}$  of compound **3** in  $\text{CDCl}_3$

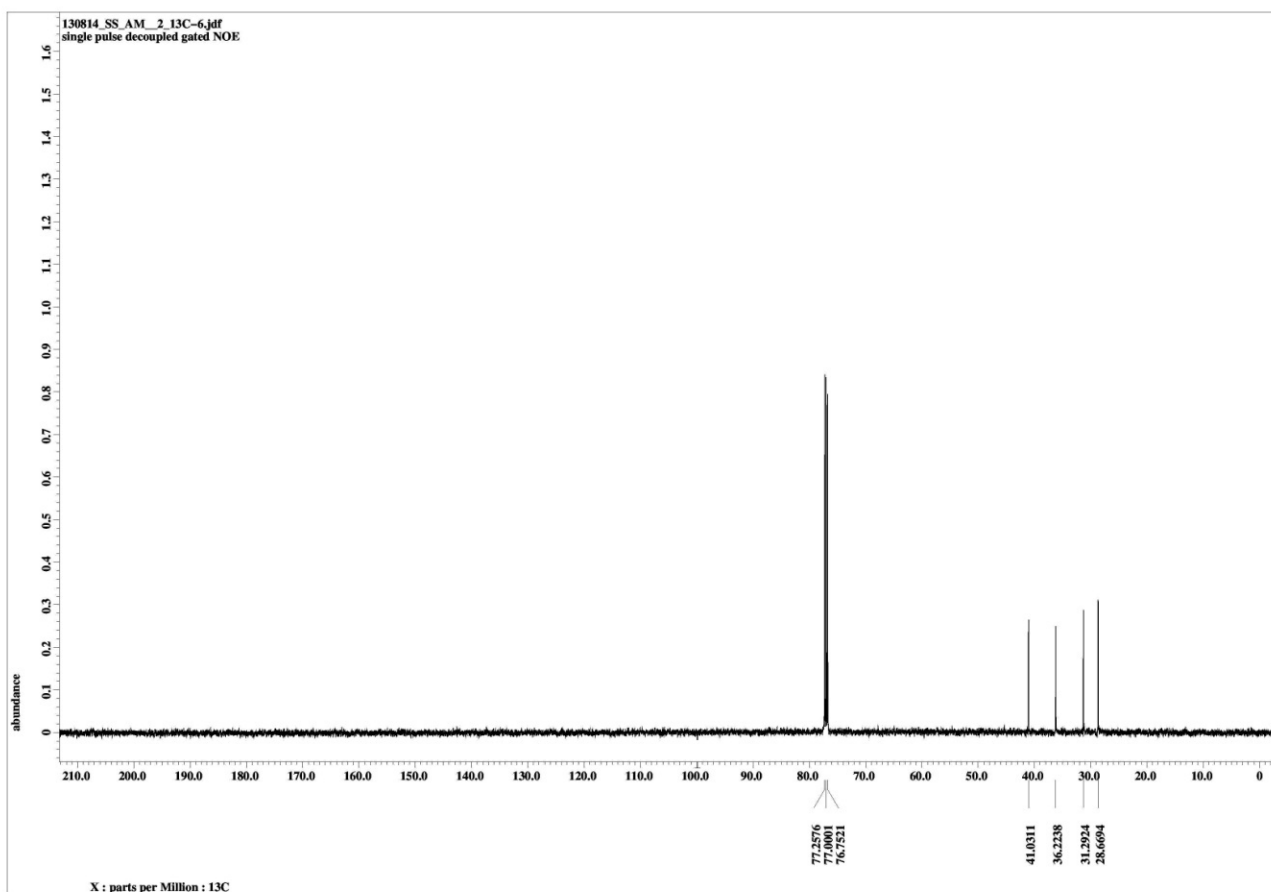

Fig. S25  $^{13}\text{C}$  NMR of compound **3** in  $\text{CDCl}_3$



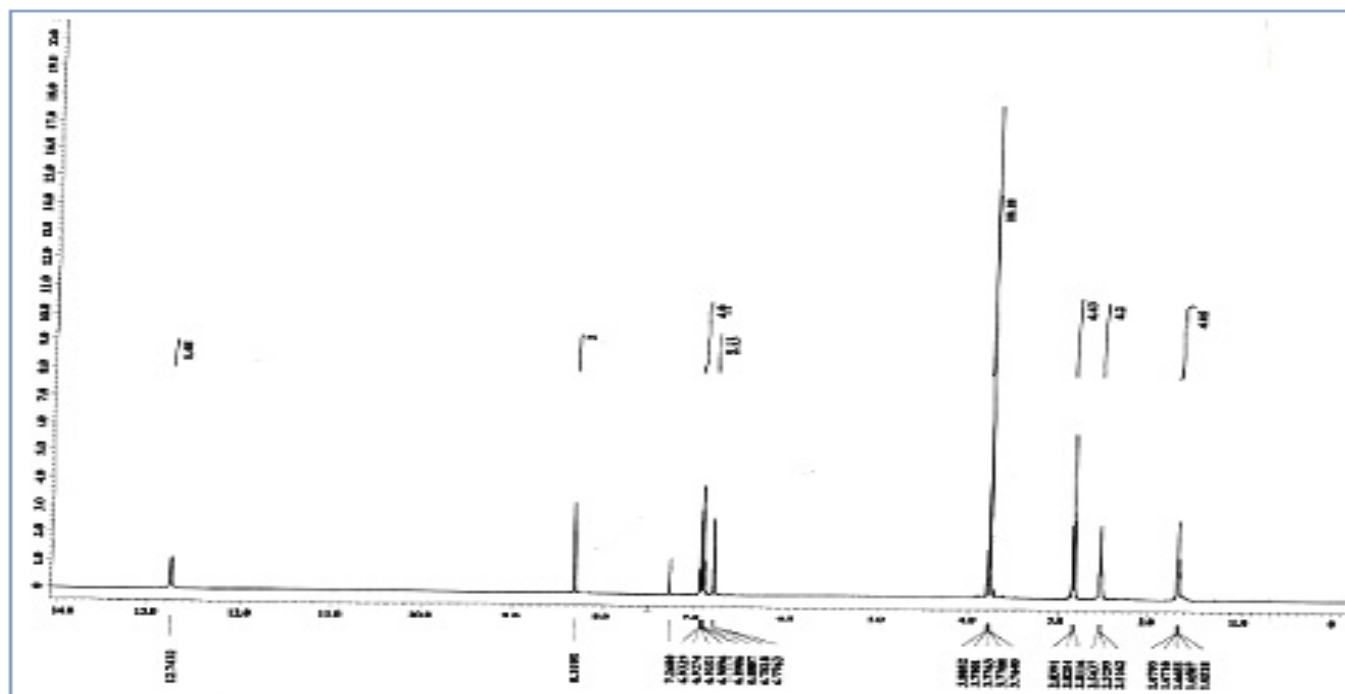

Fig. S26 <sup>1</sup>H-NMR of compound L1 in CDCl<sub>3</sub>

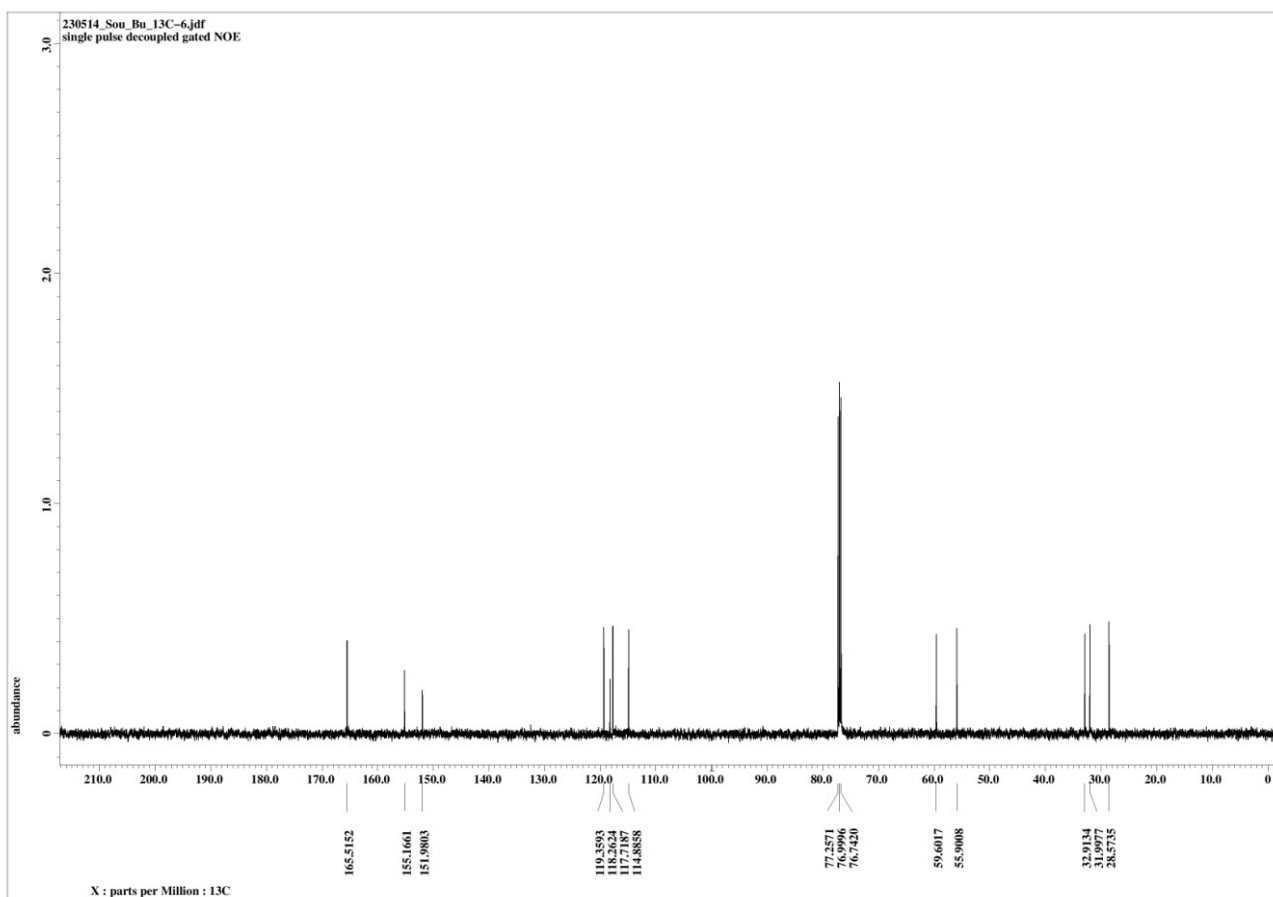

**Fig. S27**  $^{13}\text{C}$  NMR of compound **L1** in  $\text{CDCl}_3$

## References:

1. J. Meerloo, et al. Cell Sensitivity Assays: The MTT Assay. *Cancer Cell Culture: Methods and Protocols*, 2nd ed.; Methods in Molecular Biology; Springer: New York, 2011; DOI 10.1007/978-1-61779-080-5\_20; vol. 731.
2. M. J. Tim, *Immunol. Methods*, 1983, **65**, 55–63.
3. M. V. Berridge, P. M. Herst, A. S. Tan, *Biotechnol. Annu. Rev.*, 2005, **11**, 127–152.
4. T. F. Slater, B. Sawyer, U. D. Strauli, *Biochim. Biophys. Acta*, 1963, **77**, 383–393.
